# Supplementary material for: Knockdown of low-density lipoprotein receptors in skeletal muscle attenuates aging-related sarcopenia associated with mitochondrial fusion and ferroptosis
Source: Research Square preprint supplement (doi:10.21203/rs.3.rs-6891536/v1), 2025-10-06
Supplement: Supplementary file 1 [file 3eceb1fb2461c6380755ce15.docx]

**Knockdown of low-density lipoprotein receptors in skeletal muscle attenuates aging-related sarcopenia associated with mitochondrial fusion and ferroptosis**

**SUPPLEMENTARY INFORMATION**

It includes:

Figures S1-S5,Table1

**
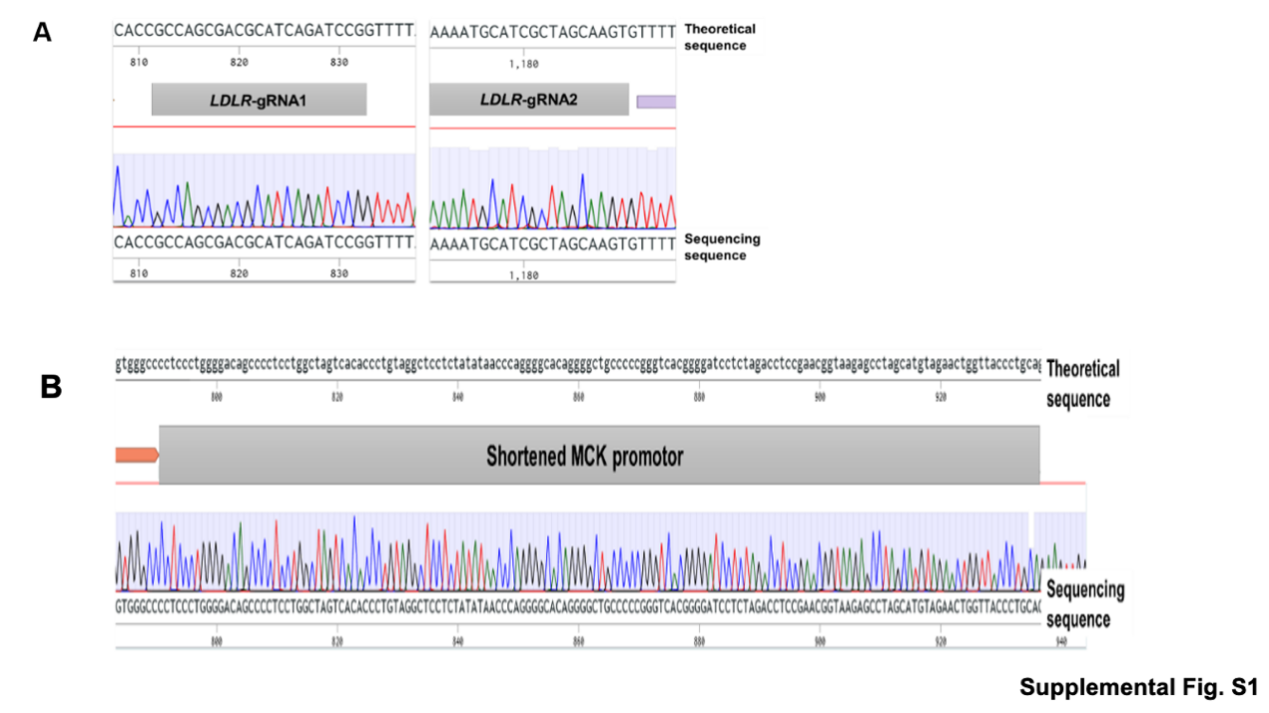
Figures S1**

**A.** LDLR knock-down vector LDLR gRNA sequence insertion site sequencing results. **B.** Sequencing results of pAAV-tMCK-Cas9 vector containing MCK promoter.

**Figures S2**

**
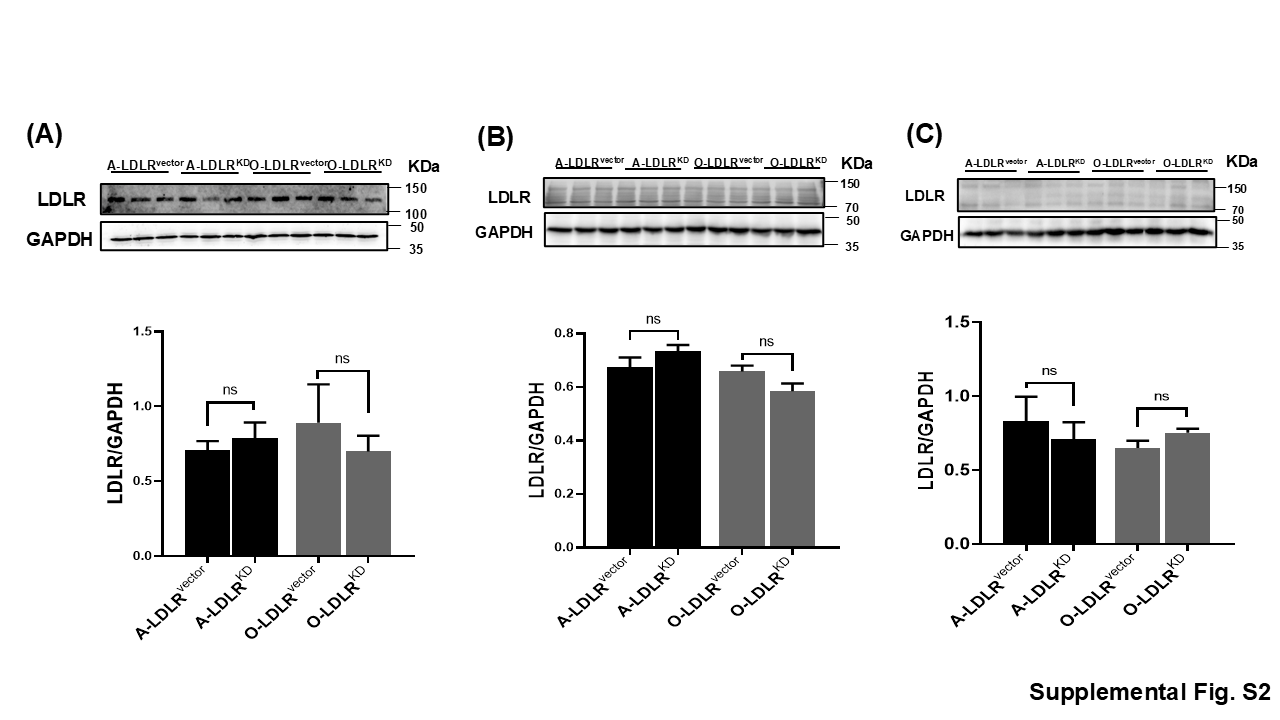
**

**A**. Representative bands of LDLR and GAPDH from heart tissue extracts and quantification of protein expression. **B**. Representative bands of LDLR and GAPDH from liver tissue extracts and quantification of protein expression. **C**. Representative bands of LDLR and GAPDH from intestine tissue extracts and quantification of protein expression. Data are shown as mean ± SEM. Two-tailed unpaired Student’s t-test.

**FiguresS3**


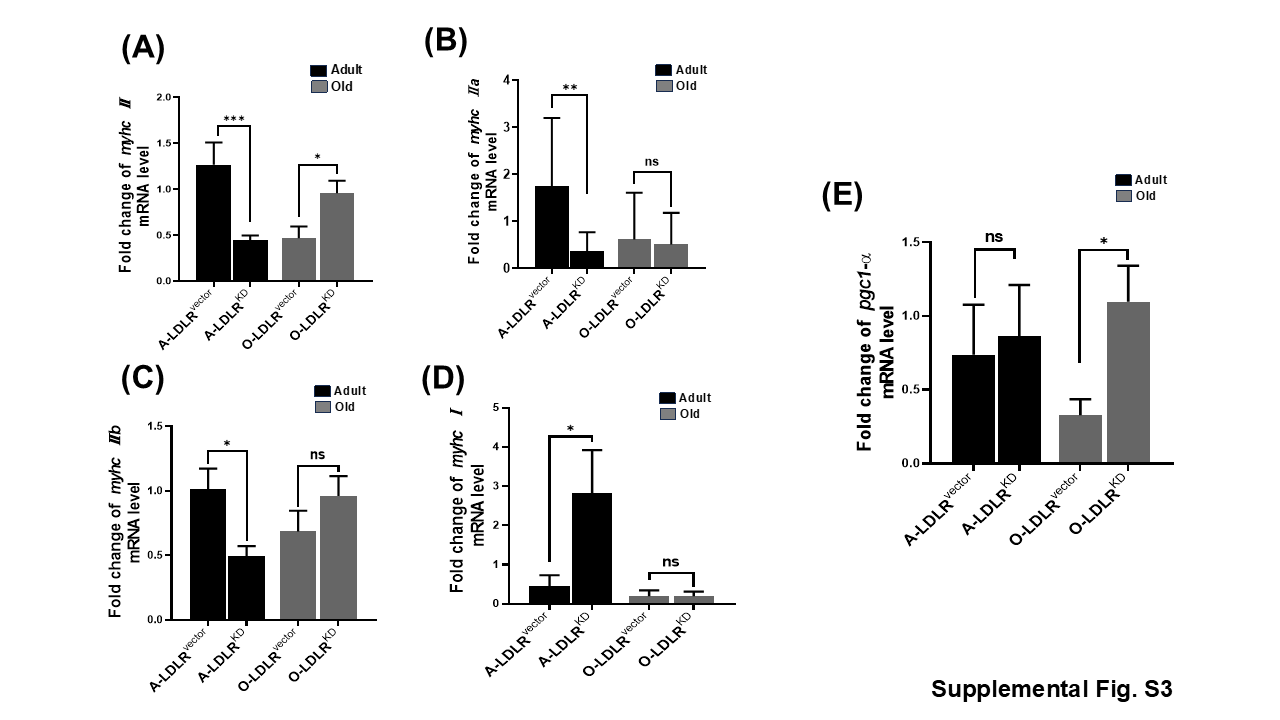


**A-E.** Quantitative real-time PCR analysis of MyHC Ⅱ mRNA levels, MyHC Ⅱ a mRNA levels , MyHC Ⅱ b mRNA levels, MyHC Ⅰ mRNA and PGC-1αmRNA levels in the quadriceps of adult (5 mon) and old (21mon) mice; Data are shown as mean ± SEM. Two-tailed unpaired Student’s t-test. Statistical significance: * *p* < 0.05, ** *p* < 0.01. **Abbreviation**: A-LDLRvector: Adult mice injected with empty vector as control; A-LDLRKD: Adult mice injected with AAV vectors to knockdown LDLR in skeletal muscle; O-LDLRvector: Old mice injected with empty vector as control; O-LDLRKD: Old mice injected with AAV vectors to knockdown LDLR in skeletal muscle.

**Figures S4**


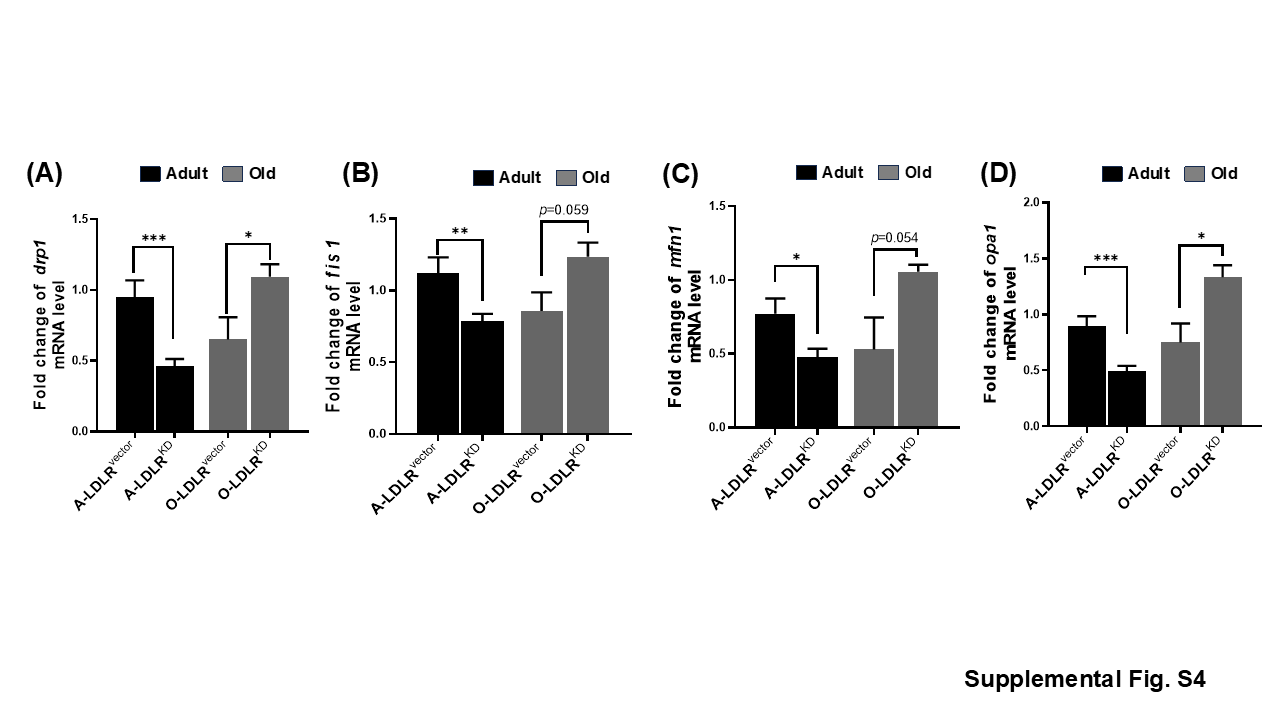


**A-D.** Quantitative real-time PCR analysisof Drp1, Fis1, Mfn1 and Opa1 mRNA level. Data are shown as mean ± SEM. Two-tailed unpaired Student’s t-test. Statistical significance: * *p* < 0.05, ** *p* < 0.01. **Abbreviation**: Opa1: Optic Atrophy 1; MFN2: Mitofusin-2; Mfn1: Mitofusin-1; Drp1: Dynamin-related protein1; Fis1: Mitochondrial fission 1 protein; A-LDLRvector: Adult mice injected with empty vector as control; A-LDLRKD: Adult mice injected with AAV vectors to knockdown LDLR in skeletal muscle; O-LDLRvector: Old mice injected with empty vector as control; O-LDLRKD: Old mice injected with AAV vectors to knockdown LDLR in skeletal muscle.

**Figures S5**


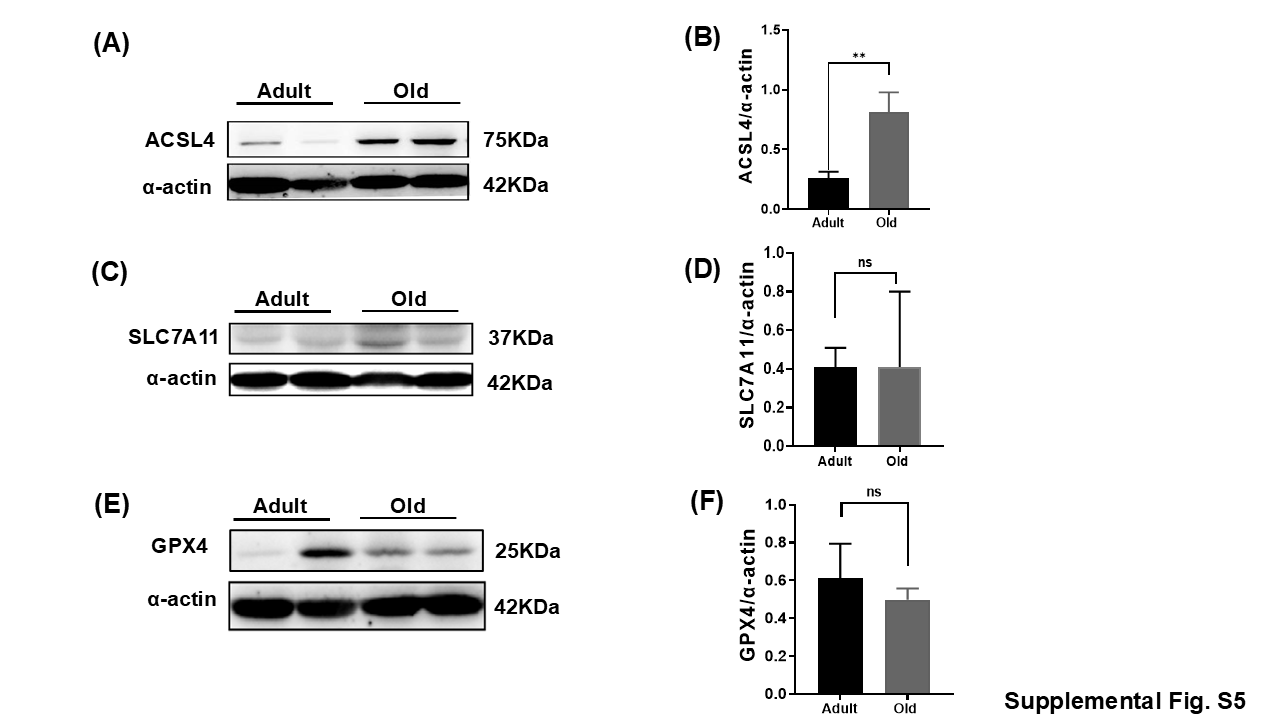


**A-F.** Representative bands of ACSL4, SLC7A11, GPX4, and a-actin from muscle tissue extracts and quantification of protein expression. Data are shown as mean ± SEM. Two-tailed unpaired Student’s t-test. Statistical significance: * *p* < 0.05, ** *p* < 0.01. **Abbreviation**: ACSL4: Acyl-CoA Synthetase Long-Chain Family Member 4; SLC7A11: Solute Carrier Family 7 Member 11; GPX4 : Glutathione peroxidase 4.

| Gene | Forward primer (5’-3’) | Reverse primer (5’-3’) |
| --- | --- | --- |
| *OPA1* | GATGACACGCTCTCCAGTGAAG | CTCGGGGCTAACAGTACAACC |
| *MFN1* | ATTGGGGAGGTGCTGTCTC | TTCGGTCATAAGGTAGGCTTT |
| *Fis1* | AAGTATGTGCGAGGGCTGT | TGCCTACCAGTCCATCTTTC |
| *Drp1* | TCAACACAAAACACCCCGAC | CAGCATTCCTCTCCAGTTGC |
| *MuRF* | TTTGACACCCTCTACGCCAT | TTGGCACTTGAGAGGAAGGT |
| *Atrogin* | TCAGAGAGGCAGATTCGCAA | TCCAGGAGAGAATGTGGCAG |
| *MyHC-II* | ACTTTGGCACTACGGGGAAAC | CAGCAGCATTTCGATCAGCTC |
| *MyHC-IIa* | CAGCTGCACCTTCTCGTTTG | CCCGAAAACGGCCATCT |
| *MyHC-IIb* | CAATCAGGAACCTTCGGAACAC | GTCCTGGCCTCTGAGAGCAT |
| *MyHC-I* | GCCTGGGCTTACCTCTCTATCAC | CTTCTCAGACTTCCGCAGGAA |
| *Alpha Actin* | ATCGGTATGGAGTCTGCGG | CACACTGAGTACTTGCGCTC |

**Table 1**. Sequences of gene-specific primers for qPCR
